# Supplementary material
Source: PubMed Central journal article supplement (PMC8796168)
Supplement: NIHMS1697033-supplement-Supplemental_Material.pdf [file NIHMS1697033-supplement-Supplemental_Material.pdf]

SOCIAL COMPARISONS IN SOCIAL ANXIETY

Supplemental Tables

Table S1

Study 1: Confidence Intervals for Within- and Between-Person Correlations among Focal Study Variables

| Level          | Variables                           | <i>r</i>             | 95% conf. int. |       |       |
|----------------|-------------------------------------|----------------------|----------------|-------|-------|
| Within-person  | Social comparison favorability (SC) | Positive affect (PA) | .389           | .362  | .416  |
|                |                                     | Negative affect (NA) | -.387          | -.414 | -.360 |
|                |                                     | Social anxiety (SA)  | -.212          | -.242 | -.182 |
|                | Positive affect (PA)                | Negative affect (NA) | -.400          | -.426 | -.373 |
|                |                                     | Social anxiety (SA)  | -.055          | -.087 | -.024 |
|                |                                     | Social anxiety (SA)  | .301           | .272  | .329  |
| Between-person | Social comparison favorability (SC) | Positive affect (PA) | .450           | .327  | .558  |
|                |                                     | Negative affect (NA) | -.366          | -.485 | -.234 |
|                |                                     | Social anxiety (SA)  | -.310          | -.435 | -.174 |
|                | Positive affect (PA)                | Negative affect (NA) | -.327          | -.450 | -.192 |
|                |                                     | Social anxiety (SA)  | -.254          | -.384 | -.114 |
|                |                                     | Social anxiety (SA)  | .603           | .502  | .687  |

SOCIAL COMPARISONS IN SOCIAL ANXIETY

**Table S2**

Study 2: Confidence Intervals for Within- and Between-Person Correlations among Focal Study Variables

| Level          | Variables                           |                      | <i>r</i> | 95% conf. int. |       |
|----------------|-------------------------------------|----------------------|----------|----------------|-------|
| Within-person  | Social comparison favorability (SC) | Positive affect (PA) | .417     | .393           | .441  |
|                |                                     | Negative affect (NA) | -.401    | -.426          | -.377 |
|                |                                     | Social anxiety (SA)  | -.316    | -.341          | -.289 |
|                | Positive affect (PA)                | Negative affect (NA) | -.465    | -.488          | -.442 |
|                |                                     | Social anxiety (SA)  | -.169    | -.197          | -.140 |
|                |                                     | Social anxiety (SA)  | .356     | .330           | .381  |
| Between-person | Social comparison favorability (SC) | Positive affect (PA) | .733     | .618           | .818  |
|                |                                     | Negative affect (NA) | -.485    | -.631          | -.306 |
|                |                                     | Social anxiety (SA)  | -.472    | -.621          | -.290 |
|                | Positive affect (PA)                | Negative affect (NA) | -.419    | -.579          | -.229 |
|                |                                     | Social anxiety (SA)  | -.261    | -.447          | -.053 |
|                |                                     | Social anxiety (SA)  | .688     | .558           | .785  |

## SOCIAL COMPARISONS IN SOCIAL ANXIETY

**Table S3**

Study 2: SAD Diagnosis Differences on Social Comparison Instability, Accounting for Uneven Time Intervals

| Term                              | Within-day social comparison instability <sup>a</sup> |                |       | <i>t</i> |
|-----------------------------------|-------------------------------------------------------|----------------|-------|----------|
|                                   | <i>b</i>                                              | 95% conf. int. |       |          |
| (Intercept)                       | 12.49                                                 | 6.76           | 18.23 | 4.24     |
| SAD diagnosis                     | 1.82                                                  | -0.84          | 4.47  | 1.33     |
| Person-level mean SC favorability | -0.07                                                 | -0.15          | 0.010 | -1.71    |
| $\tau_{00}$ Person                | 5.01                                                  | 4.14           | 5.87  |          |
| $\tau_{00}$ Day                   | 7.06                                                  | 6.77           | 7.38  |          |
| $\sigma_{res}$                    |                                                       |                |       |          |
| Marginal $R^2$                    | 0.042                                                 | -0.025         | 0.074 |          |
| Conditional $R^2$                 | 0.363                                                 | 0.273          | 0.438 |          |
| <i>N</i> people                   | 87                                                    |                |       |          |
| <i>N</i> days                     | 1088                                                  |                |       |          |
| <i>N</i> observations             |                                                       |                |       |          |

*Note.* Focal parameter estimates shaded in gray; SAD = social anxiety disorder; SC = social comparison; *b* = unstandardized regression coefficient; conf. int. = confidence (compatibility) intervals constructed using profile likelihood for *b*,  $\tau$ , and  $\sigma$  and empirical parametric bootstrap for  $R^2$ ; for single-level models,  $R^2$  is adjusted  $R^2$  and confidence intervals constructed using pivots for *b* and  $\sigma$  and bias-corrected accelerated nonparametric bootstrap; SC favorability scaled as POMP scores; SC instability scaled as the RMSSD between successive within-day observations;  $\tau_{00}$  = random effects standard deviation,  $\sigma$  = residual standard deviation; \* results do not meaningfully change if we also control for day-level SC favorability. Time intervals accounted for using the normalized time interval adjustment procedure described by Jahng et al. (2008, Equation 12). Following their procedure, successive differences between SC scores were adjusted by dividing the observed score difference by the normalized time interval between assessments (expressed in hours). The normalized time interval for between measurements *i* and *i* - 1 for a person on a day was computed as  $(Interval)_i / Median(Interval)^\lambda$ , where  $Median(Interval)$  is the median interval between successive measurements across people and days and  $\lambda$  is an exponent that was chosen to minimize the relationship absolute successive score differences and time interval (see Jahng et al., 2008, Equation 12). The estimated  $\lambda$  was  $\lambda = 0.1604942$ . This led to adjustments to the observed successive social comparison score differences with mean = 1.00 ( $SD = 0.09$ ,  $min = 0.43$ ,  $max = 1.36$ ). These adjustments were minor and had no discernible effect on results.

## SOCIAL COMPARISONS IN SOCIAL ANXIETY

**Table S4**

Study 2: SAD Diagnosis Differences on Social Comparison Instability, Controlling for Person-Mean Social Comparison Favorability

| Term                              | Within-day social comparison instability <sup>a</sup> |                |          |       | Across-days social comparison instability |                |          |       |
|-----------------------------------|-------------------------------------------------------|----------------|----------|-------|-------------------------------------------|----------------|----------|-------|
|                                   | <i>b</i>                                              | 95% conf. int. | <i>t</i> |       | <i>b</i>                                  | 95% conf. int. | <i>t</i> |       |
| (Intercept)                       | 12.49                                                 | 6.76           | 18.23    | 4.24  | 9.31                                      | 2.51           | 16.11    | 2.72  |
| SAD diagnosis                     | 1.82                                                  | -0.84          | 4.47     | 1.33  | 2.30                                      | -0.84          | 5.45     | 1.46  |
| Person-level mean SC favorability | -0.07                                                 | -0.15          | 0.010    | -1.71 | -0.03                                     | -0.12          | 0.06     | -0.66 |
| $\tau_{00}$ Person                | 5.01                                                  | 4.14           | 5.87     |       |                                           |                |          |       |
| $\tau_{00}$ Day                   |                                                       |                |          |       |                                           |                |          |       |
| $\sigma_{res}$                    | 7.06                                                  | 6.77           | 7.38     |       | 6.28                                      | 5.38           | 7.25     |       |
| Marginal $R^2$                    | 0.042                                                 | -0.025         | 0.074    |       | 0.032                                     | 0.001          | 0.144    |       |
| Conditional $R^2$                 | 0.363                                                 | 0.273          | 0.438    |       |                                           |                |          |       |
| <i>N</i> people                   | 87                                                    |                |          |       | 87                                        |                |          |       |
| <i>N</i> days                     | 1088                                                  |                |          |       |                                           |                |          |       |
| <i>N</i> observations             |                                                       |                |          |       |                                           |                |          |       |

*Note.* Focal parameter estimates shaded in gray; SAD = social anxiety disorder; SC = social comparison; *b* = unstandardized regression coefficient; conf. int. = confidence (compatibility) intervals constructed using profile likelihood for *b*,  $\tau$ , and  $\sigma$  and empirical parametric bootstrap for  $R^2$ ; for single-level models,  $R^2$  is adjusted  $R^2$  and confidence intervals constructed using pivots for *b* and  $\sigma$  and bias-corrected accelerated nonparametric bootstrap; SC favorability scaled as POMP scores; SC instability scaled as the RMSSD between successive within-day observations;  $\tau_{00}$  = random effects standard deviation,  $\sigma$  = residual standard deviation; \* results do not meaningfully change if we also control for day-level SC favorability.

## SOCIAL COMPARISONS IN SOCIAL ANXIETY

**Table S5**

Study 2: Within-Day Social Comparison Instability Predicting Average Within-Day Affect and Social Anxiety, Accounting for Uneven Time Intervals

| Term                                        | Positive affect |                |       |          | Negative affect |                |       |          | Social anxiety |                |       |          |
|---------------------------------------------|-----------------|----------------|-------|----------|-----------------|----------------|-------|----------|----------------|----------------|-------|----------|
|                                             | <i>b</i>        | 95% conf. int. |       | <i>t</i> | <i>b</i>        | 95% conf. int. |       | <i>t</i> | <i>b</i>       | 95% conf. int. |       | <i>t</i> |
| (Intercept)                                 | 48.25           | 40.43          | 56.08 | 12.08    | 7.54            | 3.76           | 11.32 | 3.91     | 9.63           | 2.86           | 16.39 | 2.79     |
| Within-day SC instability                   | -0.09           | -0.19          | 0.01  | -1.84    | 0.10            | 0.04           | 0.16  | 3.16     | 0.20           | 0.11           | 0.28  | 4.44     |
| Person-level mean within-day SC instability | -0.86           | -1.60          | -0.12 | -2.27    | 0.41            | 0.05           | 0.77  | 2.24     | 0.43           | -0.21          | 1.07  | 1.31     |
| $\tau_{00}$ Person                          | 19.12           | 16.32          | 22.17 |          | 9.14            | 7.77           | 10.62 |          | 16.53          | 14.10          | 19.18 |          |
| $\sigma_{res}$                              | 11.12           | 10.65          | 11.62 |          | 6.98            | 6.68           | 7.30  |          | 9.78           | 9.37           | 10.22 |          |
| Marginal $R^2$                              | 0.055           | -0.041         | 0.106 |          | 0.061           | -0.038         | 0.112 |          | 0.036          | -0.055         | 0.068 |          |
| Conditional $R^2$                           | 0.761           | 0.704          | 0.830 |          | 0.654           | 0.583          | 0.730 |          | 0.750          | 0.694          | 0.816 |          |
| <i>N</i> people                             | 87              |                |       |          | 87              |                |       |          | 87             |                |       |          |
| <i>N</i> days                               | 1088            |                |       |          | 1088            |                |       |          | 1088           |                |       |          |

*Note.* Focal parameter estimates shaded in gray; SC = social comparison; *b* = unstandardized regression coefficient; conf. int. = confidence (compatibility) intervals constructed using profile likelihood for *b*,  $\tau$ , and  $\sigma$  and empirical parametric bootstrap for  $R^2$ ; SC favorability scaled as POMP scores; SC instability scaled as the RMSSD between successive within-day observations;  $\tau_{00}$  = random effects standard deviation,  $\sigma$  = residual standard deviation.

SOCIAL COMPARISONS IN SOCIAL ANXIETY

Table S6

Study 2: SAD Diagnosis Moderation of Social Comparison Instability Effects, Including Within-Day Mean Social Comparison as a Covariate

| Term                                                        | Positive affect |                |       |          | Negative affect |                |       |          | Social anxiety |                |       |          |
|-------------------------------------------------------------|-----------------|----------------|-------|----------|-----------------|----------------|-------|----------|----------------|----------------|-------|----------|
|                                                             | <i>b</i>        | 95% conf. int. |       | <i>t</i> | <i>b</i>        | 95% conf. int. |       | <i>t</i> | <i>b</i>       | 95% conf. int. |       | <i>t</i> |
| (Intercept)                                                 | 53.89           | 44.94          | 62.85 | 11.65    | 3.96            | -0.19          | 8.12  | 1.85     | 3.80           | -3.50          | 11.09 | 1.01     |
| Within-day SC instability                                   | 0.02            | -0.11          | 0.15  | 0.32     | 0.09            | 0.01           | 0.17  | 2.29     | 0.11           | 0.00           | 0.23  | 1.89     |
| SAD diagnosis                                               | -18.59          | -33.47         | -3.71 | -2.42    | 11.56           | 4.66           | 18.46 | 3.24     | 19.47          | 7.36           | 31.59 | 3.11     |
| Person-level mean within-day SC instability                 | -0.79           | -1.76          | 0.17  | -1.59    | 0.35            | -0.10          | 0.81  | 1.52     | 0.24           | -0.55          | 1.02  | 0.58     |
| Within-day mean SC favorability                             | 0.59            | 0.47           | 0.72  | 9.20     | -0.19           | -0.26          | -0.11 | -4.72    | -0.14          | -0.25          | -0.03 | -2.42    |
| Within-day SC instability × SAD diagnosis                   | 0.00            | -0.18          | 0.18  | -0.03    | -0.12           | -0.23          | -0.01 | -2.18    | 0.04           | -0.12          | 0.19  | 0.45     |
| Person-level mean within-day SC instability × SAD diagnosis | 0.33            | -1.05          | 1.72  | 0.47     | -0.16           | -0.81          | 0.49  | -0.47    | -0.24          | -1.38          | 0.89  | -0.42    |
| Within-day mean SC favorability × SAD diagnosis             | 0.08            | -0.09          | 0.25  | 0.88     | -0.38           | -0.49          | -0.28 | -7.17    | -0.62          | -0.77          | -0.47 | -8.09    |
| <i>Simple slopes for within-day SC instability</i>          |                 |                |       |          |                 |                |       |          |                |                |       |          |
| SAD diagnosis = No                                          | 0.02            | -0.11          | 0.15  | 0.32     | 0.09            | 0.01           | 0.17  | 2.29     | 0.11           | 0.00           | 0.23  | 1.89     |
| SAD diagnosis = Yes                                         | 0.02            | -0.10          | 0.14  | 0.30     | -0.03           | -0.10          | 0.05  | -0.75    | 0.15           | 0.04           | 0.25  | 2.68     |
| $\tau_{00}$ Person                                          | 17.60           | 14.84          | 20.16 |          | 8.08            | 6.79           | 9.28  |          | 14.30          | 12.05          | 16.40 |          |
| $\sigma_{res}$                                              | 10.10           | 9.66           | 10.54 |          | 6.19            | 5.91           | 6.46  |          | 8.85           | 8.46           | 9.23  |          |
| Marginal $R^2$                                              | 0.209           | 0.085          | 0.292 |          | 0.271           | 0.160          | 0.361 |          | 0.270          | 0.149          | 0.369 |          |
| Conditional $R^2$                                           | 0.804           | 0.757          | 0.851 |          | 0.731           | 0.676          | 0.783 |          | 0.798          | 0.753          | 0.843 |          |
| <i>N</i> people                                             | 87              |                |       |          | 87              |                |       |          | 87             |                |       |          |
| <i>N</i> days                                               | 1088            |                |       |          | 1088            |                |       |          | 1088           |                |       |          |

Note. Focal parameter estimates shaded in gray; SAD = social anxiety disorder; SC = social comparison; *b* = unstandardized regression coefficient; conf. int. = confidence (compatibility) intervals constructed using profile likelihood for *b*,  $\tau$ , and  $\sigma$  and empirical parametric bootstrap

## SOCIAL COMPARISONS IN SOCIAL ANXIETY

for  $R^2$ ; SC favorability scaled as POMP scores; SC instability scaled as the RMSSD between successive within-day observations;  $\tau_{00}$  = random effects standard deviation,  $\sigma$  = residual standard deviation.

SOCIAL COMPARISONS IN SOCIAL ANXIETY

**Table S7**

Study 2: Lagged Analysis: SAD Diagnosis Moderation of Later Within-Day Affect, Social Anxiety, and Social Comparison Favorability Predictions

| Term                                                              | Positive affect |                |                |       | Negative affect |                |          |       | Social anxiety |                |          |       |
|-------------------------------------------------------------------|-----------------|----------------|----------------|-------|-----------------|----------------|----------|-------|----------------|----------------|----------|-------|
|                                                                   | <i>b</i>        | 95% conf. int. | <i>t</i>       |       | <i>b</i>        | 95% conf. int. | <i>t</i> |       | <i>b</i>       | 95% conf. int. | <i>t</i> |       |
| <i>Predicting later within-day affect/anxiety</i>                 |                 |                |                |       |                 |                |          |       |                |                |          |       |
| (Intercept)                                                       | 47.85           | 42.56          | 53.15          | 17.71 | 7.27            | 4.75           | 9.79     | 5.66  | 6.22           | 2.01           | 10.43    | 2.89  |
| Lagged SC favorability                                            | 0.04            | -0.02          | 0.11           | 1.28  | 0.02            | -0.03          | 0.07     | 0.74  | 0.00           | -0.06          | 0.06     | -0.01 |
| SAD diagnosis                                                     | -17.03          | -24.65         | -9.40          | -4.38 | 9.76            | 6.13           | 13.38    | 5.28  | 17.65          | 11.59          | 23.71    | 5.70  |
| Lagged affect/anxiety                                             | 0.43            | 0.38           | 0.47           | 19.25 | 0.28            | 0.21           | 0.34     | 9.72  | 0.12           | 0.04           | 0.19     | 3.43  |
| Lagged SC favorability × SAD diagnosis                            | 0.01            | -0.08          | 0.11           | 0.29  | -0.12           | -0.18          | -0.05    | -3.40 | -0.07          | -0.16          | 0.02     | -1.63 |
| Lagged affect/anxiety × SAD diagnosis                             | -0.11           | -0.18          | -0.04          | -3.10 | 0.00            | -0.07          | 0.07     | 0.06  | 0.23           | 0.15           | 0.31     | 5.66  |
| $\tau_{00}$ Person                                                | 17.96           | 15.36          | 20.80          |       | 2.17            | 0.00           | 3.12     |       | 3.99           | 2.56           | 5.09     |       |
| $\tau_{00}$ Day                                                   | — <sup>a</sup>  | — <sup>a</sup> | — <sup>a</sup> |       | 8.42            | 7.17           | 9.79     |       | 14.18          | 12.09          | 16.47    |       |
| $\sigma_{res}$                                                    | 13.79           | 13.46          | 14.12          |       | 9.33            | 9.02           | 9.65     |       | 12.52          | 12.11          | 12.95    |       |
| Marginal $R^2$                                                    | 0.176           | 0.074          | 0.253          |       | 0.173           | 0.082          | 0.242    |       | 0.211          | 0.099          | 0.300    |       |
| Conditional $R^2$                                                 | 0.694           | 0.640          | 0.757          |       | 0.558           | 0.492          | 0.627    |       | 0.669          | 0.612          | 0.733    |       |
| <i>Predicting later within-day social comparison favorability</i> |                 |                |                |       |                 |                |          |       |                |                |          |       |
| (Intercept)                                                       | 70.29           | 66.04          | 74.54          | 32.39 | 70.29           | 66.03          | 74.54    | 32.36 | 70.29          | 66.04          | 74.54    | 32.38 |
| Lagged SC favorability                                            | 0.34            | 0.27           | 0.40           | 12.96 | 0.35            | 0.28           | 0.40     | 13.20 | 0.35           | 0.29           | 0.41     | 14.08 |
| SAD diagnosis                                                     | -17.54          | -23.66         | -11.42         | -5.61 | -17.55          | -23.68         | -11.43   | -5.61 | -17.54         | -23.67         | -11.42   | -5.61 |
| Lagged affect/anxiety                                             | 0.01            | -0.02          | 0.04           | 0.48  | -0.01           | -0.07          | 0.05     | -0.29 | 0.03           | -0.02          | 0.09     | 1.20  |
| Lagged SC favorability × SAD diagnosis                            | -0.03           | -0.11          | 0.04           | -0.90 | -0.07           | -0.14          | 0.00     | -1.90 | -0.07          | -0.14          | 0.00     | -1.90 |
| Lagged affect/anxiety × SAD diagnosis                             | 0.00            | -0.05          | 0.06           | 0.13  | -0.08           | -0.16          | 0.00     | -2.00 | -0.08          | -0.14          | -0.02    | -2.58 |
| $\tau_{00}$ Person                                                | 1.13            | 0.00           | 2.67           |       | 0.87            | 0.00           | 2.56     |       | 1.02           | 0.00           | 2.62     |       |
| $\tau_{00}$ Day                                                   | 14.43           | 12.34          | 16.72          |       | 14.45           | 12.35          | 16.73    |       | 14.44          | 12.35          | 16.72    |       |
| $\sigma_{res}$                                                    | 10.36           | 10.01          | 10.66          |       | 10.36           | 10.01          | 10.64    |       | 10.35          | 10.01          | 10.64    |       |



## SOCIAL COMPARISONS IN SOCIAL ANXIETY

|                   |       |       |       |       |       |       |       |       |       |
|-------------------|-------|-------|-------|-------|-------|-------|-------|-------|-------|
| Marginal $R^2$    | 0.221 | 0.099 | 0.320 | 0.223 | 0.102 | 0.321 | 0.222 | 0.102 | 0.321 |
| Conditional $R^2$ | 0.736 | 0.685 | 0.797 | 0.737 | 0.685 | 0.797 | 0.737 | 0.685 | 0.798 |
| $N$ people        | 87    |       |       | 87    |       |       | 87    |       |       |
| $N$ days          | 1088  |       |       | 1088  |       |       | 1088  |       |       |
| $N$ observations  | 3422  |       |       | 3422  |       |       | 3422  |       |       |

*Note.* Focal parameter estimates shaded in gray; SAD = social anxiety disorder; SC = social comparison;  $b$  = unstandardized regression coefficient; conf. int. = confidence (compatibility) intervals constructed using profile likelihood for  $b$ ,  $\tau$ , and  $\sigma$  and empirical parametric bootstrap for  $R^2$ ; SC favorability scaled as POMP scores;  $\tau_{00}$  = random effects standard deviation,  $\sigma$  = residual standard deviation.

SOCIAL COMPARISONS IN SOCIAL ANXIETY

**Table S8**

Study 2: Three-Way Interaction of SAD Diagnosis and Presence of People Moderating Social Comparison Favorability Relationships with Affect and Social Anxiety

| Term                                                   | Positive affect |                |          |       | Negative affect |                |          |       | Social anxiety |                |          |       |
|--------------------------------------------------------|-----------------|----------------|----------|-------|-----------------|----------------|----------|-------|----------------|----------------|----------|-------|
|                                                        | <i>b</i>        | 95% conf. int. | <i>t</i> |       | <i>b</i>        | 95% conf. int. | <i>t</i> |       | <i>b</i>       | 95% conf. int. | <i>t</i> |       |
| (Intercept)                                            | 46.54           | 41.32          | 51.76    | 17.47 | 7.80            | 5.29           | 10.30    | 6.09  | 5.38           | 1.08           | 9.68     | 2.45  |
| SC favorability                                        | 0.46            | 0.38           | 0.54     | 11.55 | -0.25           | -0.31          | -0.20    | -8.91 | -0.20          | -0.27          | -0.12    | -4.86 |
| People present                                         | 3.04            | 1.86           | 4.23     | 5.02  | -0.85           | -1.70          | -0.01    | -1.99 | 2.43           | 1.23           | 3.62     | 3.99  |
| SAD diagnosis                                          | -16.64          | -24.15         | -9.14    | -4.34 | 10.11           | 6.51           | 13.71    | 5.50  | 17.56          | 11.37          | 23.75    | 5.56  |
| SC favorability ×<br>People present                    | 0.08            | -0.02          | 0.19     | 1.59  | -0.08           | -0.15          | 0.00     | -2.05 | -0.04          | -0.14          | 0.07     | -0.66 |
| SC favorability × SAD<br>diagnosis                     | 0.10            | 0.00           | 0.20     | 2.06  | -0.15           | -0.22          | -0.08    | -4.21 | -0.31          | -0.41          | -0.21    | -6.05 |
| People present ×<br>SAD diagnosis                      | -1.35           | -3.11          | 0.40     | -1.51 | 0.41            | -0.84          | 1.66     | 0.65  | 2.58           | 0.82           | 4.35     | 2.87  |
| SC favorability ×<br>People present ×<br>SAD diagnosis | 0.00            | -0.14          | 0.14     | -0.01 | 0.04            | -0.06          | 0.14     | 0.84  | -0.07          | -0.22          | 0.07     | -1.01 |
| $\tau_{00}$ Person                                     | 8.24            | 7.71           | 8.79     |       | 4.73            | 4.35           | 5.11     |       | 6.82           | 6.30           | 7.36     |       |
| $\tau_{00}$ Day                                        | 17.52           | 14.96          | 20.32    |       | 8.26            | 7.02           | 9.60     |       | 14.36          | 12.24          | 16.67    |       |
| $\sigma_{res}$                                         | 11.15           | 10.88          | 11.41    |       | 8.19            | 7.99           | 8.38     |       | 11.54          | 11.27          | 11.82    |       |
| Marginal $R^2$                                         | 0.187           | 0.085          | 0.266    |       | 0.214           | 0.131          | 0.285    |       | 0.224          | 0.122          | 0.311    |       |
| Conditional $R^2$                                      | 0.797           | 0.761          | 0.839    |       | 0.666           | 0.617          | 0.718    |       | 0.732          | 0.686          | 0.783    |       |
| <i>N</i> people                                        | 87              |                |          |       | 87              |                |          |       | 87             |                |          |       |
| <i>N</i> days                                          | 1137            |                |          |       | 1137            |                |          |       | 1137           |                |          |       |
| <i>N</i> observations                                  | 4551            |                |          |       | 4551            |                |          |       | 4551           |                |          |       |

*Note.* Focal parameter estimates shaded in gray; SAD = social anxiety disorder; SC = social comparison; *b* = unstandardized regression coefficient; conf. int. = confidence (compatibility) intervals constructed using profile likelihood for *b*,  $\tau$ , and  $\sigma$  and empirical parametric bootstrap for  $R^2$ ; SC favorability scaled as POMP scores;  $\tau_{00}$  = random effects standard deviation,  $\sigma$  = residual standard deviation.
